# Supplementary material
Source: MDPI journal article supplement (https://www.mdpi.com/2313-0105/9/3/170)
Supplement: s1 [file s1]

# Supporting information

## **Influence of the Thermal Treatment on the Structure and Cycle Life of Copper Hexacyanoferrate for Aqueous Zinc-Ion Batteries**

Mohsen Baghodrat <sup>a</sup>, Giorgia Zampardi\* <sup>a</sup>, Jens Glenneberg <sup>b</sup>, and Fabio La Mantia\* <sup>a,b</sup>

a - Energiespeicher- und Energiewandlersysteme Universität Bremen Bibliothekstraße 1, 28359 Bremen, Germany

b - Fraunhofer Institute for Manufacturing Technology and Advanced Materials – IFAM Wiener Str. 12, 28359, Bremen, Germany

E-mail: [zampardi@uni-bremen.de](mailto:zampardi@uni-bremen.de) , [lamantia@uni-bremen.de](mailto:lamantia@uni-bremen.de)

# 1. SEM images of untreated and treated CuHCF powder

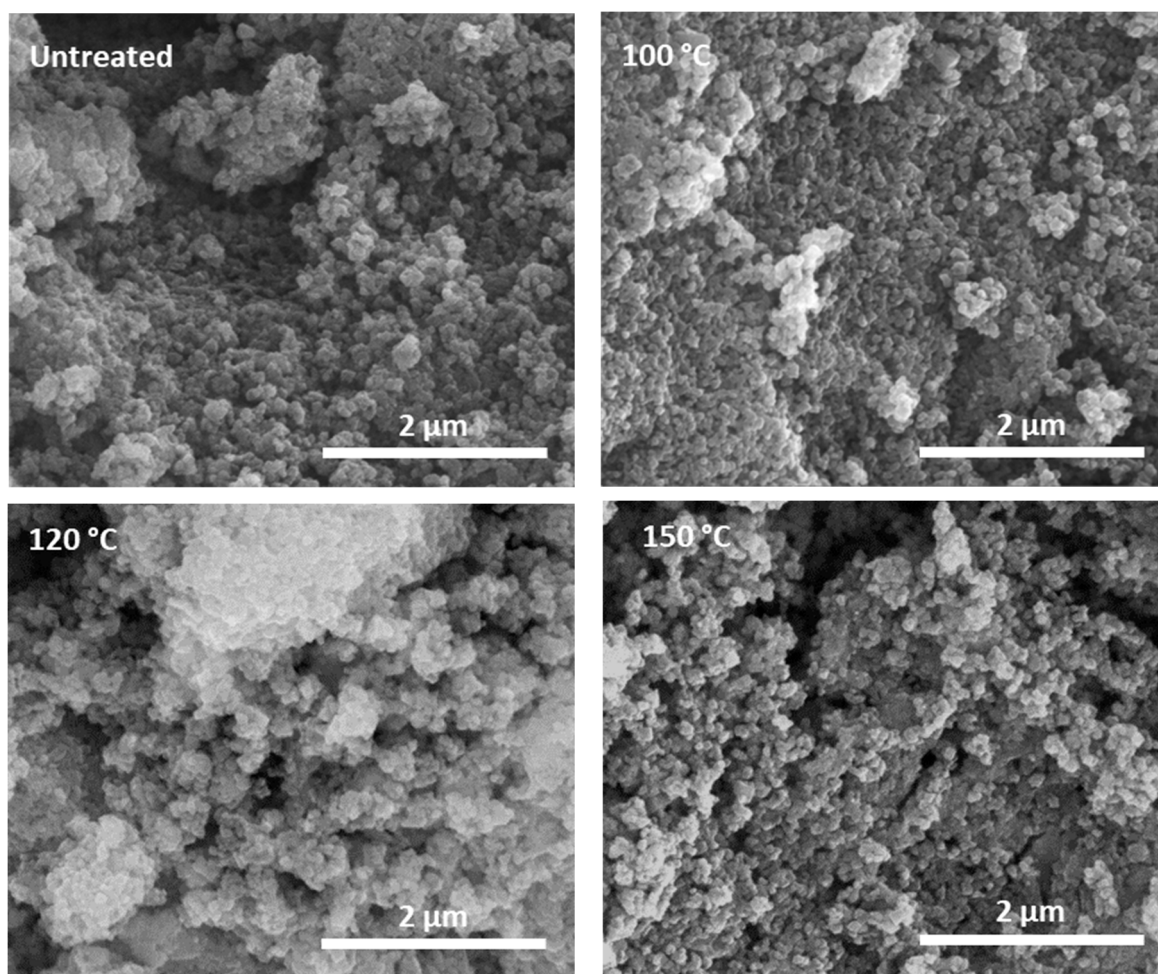

**Figure S1.** SEM images of CuHCF powder before and after thermal treatment at 100, 120, and 150 °C.

## 2. First galvanostatic cycle of CuHCF-based electrodes

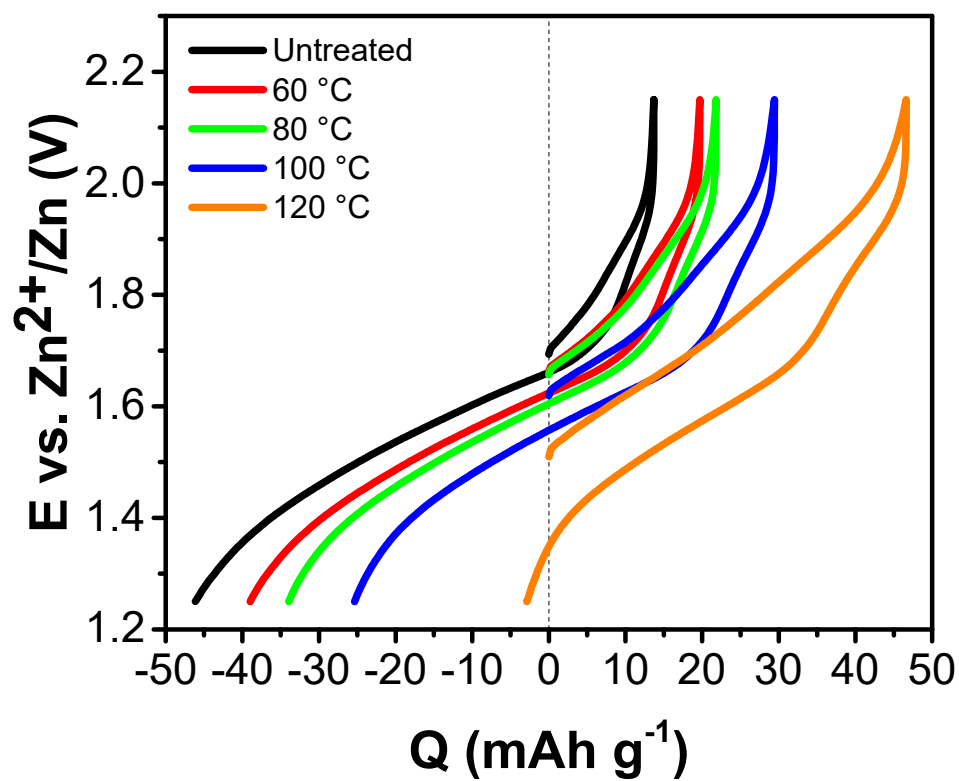

**Figure S2.** The first galvanostatic cycle of the thermally treated CuHCF-based electrodes recorded at a C-rate of 1C, in three-electrode flooded electrochemical cells containing 100 mM  $\text{ZnSO}_4$ .

### 3. Galvanostatic cycles of all CuHCF-based electrodes

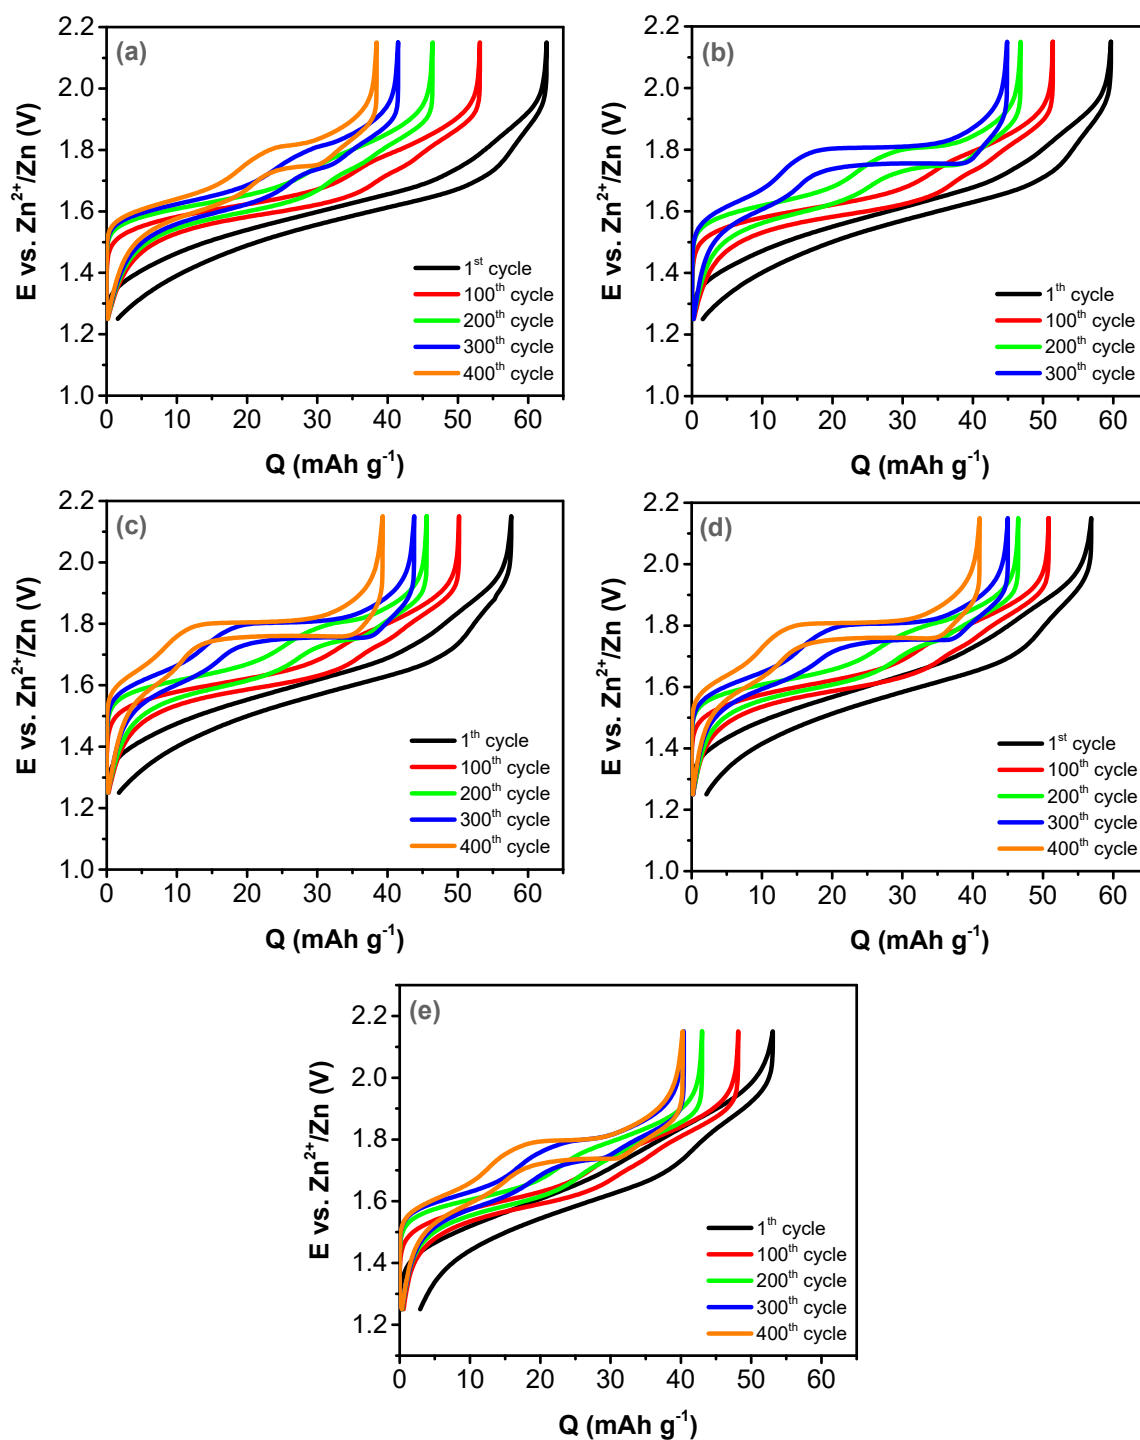

**Figure S3:** Galvanostatic cycles of all the CuHCF-based electrodes recorded in three-electrode flooded electrochemical cells containing 100 mM  $\text{ZnSO}_4$ , at a current rate of 1C. The cycled CuHCF electrodes were (a) untreated, annealed at (b) 60°C, (c) 80°C, (d) 100°C, and (e) 120°C.

#### 4. Differential charge plots of all CuHCF-based electrodes

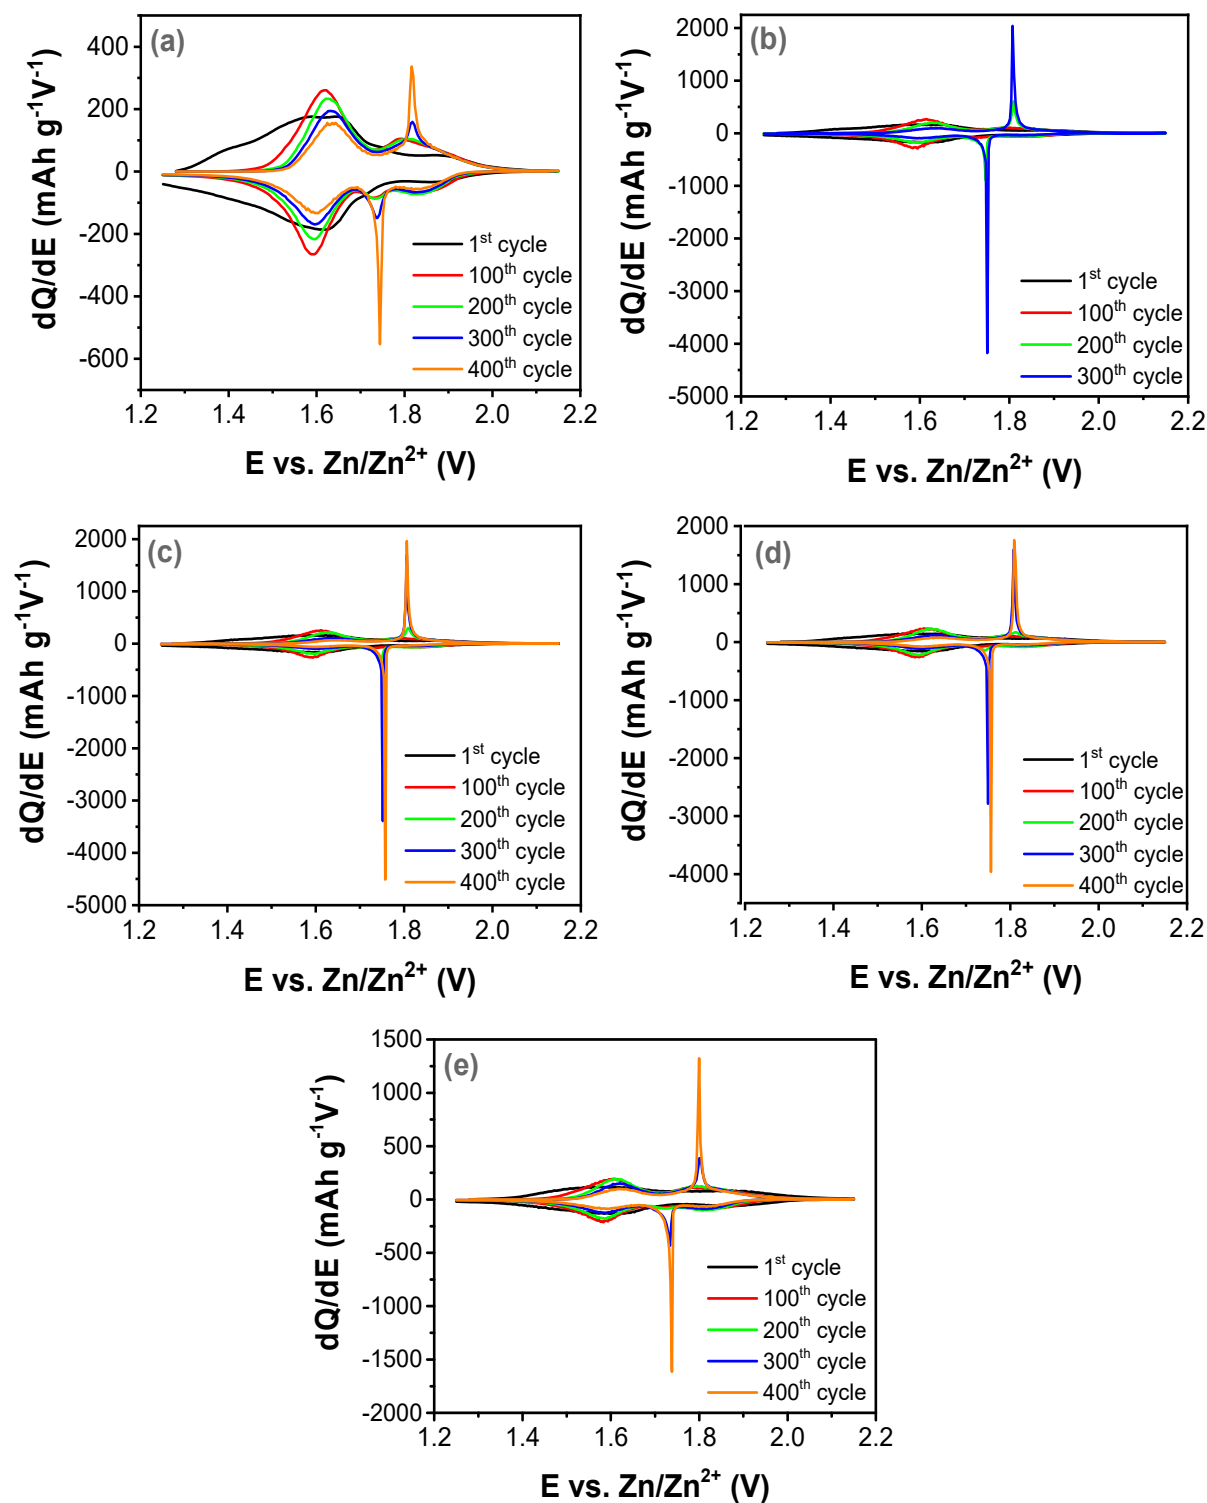

**Figure S4.** Differential charge plots of all the CuHCF-based electrodes (a) untreated, annealed at (b) 60°C, (c) 80°C, (d) 100°C, and (e) 120°C.
